# Supplementary material for: Improving health information systems during an emergency: lessons and recommendations from an Ebola treatment centre in Sierra Leone
Source: BMC Med Inform Decis Mak. 2019 May 27;19:100. doi: 10.1186/s12911-019-0817-9 (PMC6537453; doi:10.1186/s12911-019-0817-9)
Supplement: Supplementary file 2 — Forms of the paper-based health information system used at the Kerry Town Ebola treatment center. (PDF 5350 kb) [file 12911_2019_817_MOESM2_ESM.pdf]

## Improving health information systems during an emergency: lessons and recommendations from an Ebola Treatment Centre in Sierra Leone

Shefali Oza\*, Kevin Wing, Alieu A. Sesay, Sabah Boufkhed, Catherine Houlihan, Lahai Vandi, Sahr Charles Sebba, Catherine McGowan, Rachael Cummings, Francesco Checchi

\* corresponding author

### **Additional file 2: Forms for the paper-based health record system used at the Kerry Town Ebola treatment center**

This document contains the forms used at the Save the Children International's Kerry Town Ebola treatment center in Sierra Leone from 2014-2015. A description of the forms and information that comprised the paper-based Kerry Town health information system is provided in section A6 of "Additional file 1". Together, these forms encompassed demographic, epidemiological, clinical, and treatment information for individual patients, as well as information for management such as death certificates.

The majority of forms listed below were developed or adapted by us for use in the infectious wards (i.e. red zone) of the Kerry Town Ebola treatment center (ETC). The case investigation form was a standardized CDC/WHO form that we used as is. Some of these forms were revised over time; the documents here are the last versions used at the ETC.

The forms are listed below. Before each form is a descriptive page about the form.

1. Triage form.....page 2
2. Case investigation form.....page 4
3. Ward assessment form.....page 7
4. Inpatient form.....page 11
5. Drug charts.....page 14
6. Fluid infusion chart.....page 18
7. Lab request.....page 20
8. Nutrition summary form.....page 22
9. Discharge forms.....page 24
10. Exit form.....page 28
11. Patient evaluation form.....page 30
12. Discharge certificate.....page 32
13. Death certificate.....page 34

## **Triage form**

The following form was used by staff to determine if the patient met the case definition for Ebola. If s/he did meet the case definition, then the patient was admitted to a suspect ward and tested for Ebola. If s/he did not meet the case definition, then the patient was not admitted to the Kerry Town Ebola treatment center.

# Triage Form

Date: \_\_\_\_ / \_\_\_\_ / 2015

Name of patient: \_\_\_\_\_ Sex: Male ☐ Female ☐ Age: \_\_\_\_\_ Address: \_\_\_\_\_

## Clinical Status at Visit

Not Suspect Case  
(Tick ☐)

Well

Not Well

Does the patient have fever greater than 38° ☐

Or a history of self-reported fever ☐

AND 3 or more of the following:

- |                                            |                                                |
|--------------------------------------------|------------------------------------------------|
| Headache <input type="checkbox"/>          | Difficulty breathing <input type="checkbox"/>  |
| Loss of appetite <input type="checkbox"/>  | Nausea/Vomiting <input type="checkbox"/>       |
| Fatigue <input type="checkbox"/>           | Abdominal Pain <input type="checkbox"/>        |
| Joint/Muscle pain <input type="checkbox"/> | Difficulty Swallowing <input type="checkbox"/> |
| Diarrhoea <input type="checkbox"/>         | Hiccups <input type="checkbox"/>               |
| Unusual bleeding <input type="checkbox"/>  |                                                |

**In the last 3 weeks has the patient done any of these:**

- |                                                       |                          |
|-------------------------------------------------------|--------------------------|
| Cared for or been cared for by a sick person          | <input type="checkbox"/> |
| Wash the clothes of a person who was sick or has died | <input type="checkbox"/> |
| Slept with someone who was sick or has died           | <input type="checkbox"/> |
| Touched the body of someone who was sick or has died  | <input type="checkbox"/> |
| Washed the body of someone who has died               | <input type="checkbox"/> |
| Attended the funeral of someone who has had Ebola     | <input type="checkbox"/> |
| Touched a sick or dead monkey or bat                  | <input type="checkbox"/> |
| Breastfed from a sick person                          | <input type="checkbox"/> |

Suspected Ebola  
case: Admit!  
(Tick ☐)

No to both:  
Not Ebola Case  
(Tick ☐)

Suspected Ebola  
case: Admit!  
(Tick ☐)

## **Case investigation form**

The following form was a standardized form from the CDC/WHO that was either completed by us (for new suspect patients who did not yet have an Ebola test) or by a previous holding center (for confirmed patients who tested positive elsewhere and were transferred to our center for treatment). The information from this form was then sent to the government and

**EBOLA CASE INVESTIGATION FORM - Sierra Leone**Outbreak  
Case ID:

Date of Case Report: \_\_\_\_/\_\_\_\_/\_\_\_\_ (DD,MM,YYYY)

☐ Patient is a followed contact: **Convert to CASE in VHF**Complete at end of interview: ☐ suspect ☐ probable ☐ unk

Patient's Last Name: \_\_\_\_\_ First Name: \_\_\_\_\_

Age: \_\_\_\_\_ Unit: ☐ Years ☐ Months Gender: ☐ Male ☐ FemalePatient Status at Time of This Report: ☐ Alive ☐ Dead **If dead**, Date of Death: \_\_\_\_/\_\_\_\_/\_\_\_\_ (DD,MM,YYYY)**Permanent Residence:**

Head of Household: \_\_\_\_\_ Village/Town: \_\_\_\_\_

District: \_\_\_\_\_ Chiefdom: \_\_\_\_\_ Mobile phone #: \_\_\_\_\_

**Patient's Occupation:**☐ Healthcare worker (includes anyone involved with the patient: nurse, ambulance driver, hospital cleaner, etc.)

Position: \_\_\_\_\_ Healthcare facility: \_\_\_\_\_

☐ Other; please specify occupation: \_\_\_\_\_**Location Where Patient Became Ill:**

Village/Town: \_\_\_\_\_ District: \_\_\_\_\_ Chiefdom: \_\_\_\_\_

Date Patient First Became Sick: \_\_\_\_/\_\_\_\_/\_\_\_\_ (DD,MM,YYYY)

**Read each one aloud and mark an answer for every symptom occurred during this illness (not only right now):**Fever ☐ Yes ☐ No ☐ Unk Headache ☐ Yes ☐ No ☐ UnkVomiting/nausea ☐ Yes ☐ No ☐ Unk Difficulty breathing ☐ Yes ☐ No ☐ UnkDiarrhea ☐ Yes ☐ No ☐ Unk Difficulty swallowing ☐ Yes ☐ No ☐ UnkConjunctivitis (red eyes) ☐ Yes ☐ No ☐ Unk Skin rash ☐ Yes ☐ No ☐ UnkIntense fatigue/weakness ☐ Yes ☐ No ☐ Unk Hiccups ☐ Yes ☐ No ☐ UnkAnorexia/loss of appetite ☐ Yes ☐ No ☐ Unk Unexplained bleeding ☐ Yes ☐ No ☐ UnkAbdominal pain ☐ Yes ☐ No ☐ Unk If yes, please specify: \_\_\_\_\_Muscle pain ☐ Yes ☐ No ☐ Unk Other symptoms: ☐ Yes ☐ No ☐ UnkJoint pain ☐ Yes ☐ No ☐ Unk If yes, please specify: \_\_\_\_\_**At the time of this report, is the patient hospitalized or being admitted to the hospital?** ☐ Yes ☐ No ☐ Unk

If yes, Date of Hospital Admission: \_\_\_\_/\_\_\_\_/\_\_\_\_ (DD,MM,YYYY)

Hospital Name: \_\_\_\_\_ District: \_\_\_\_\_

Is the patient now, or will he/she soon be, in an Ebola treatment unit? ☐ Yes ☐ No ☐ Unk**If yes**, date of admission (or future admission) to the ETU (isolation): \_\_\_\_/\_\_\_\_/\_\_\_\_ (DD,MM,YYYY)**Was the patient hospitalized or visit a clinic previously for this illness (this includes any type of care: pharmacist, traditional healer, etc.)?** ☐ Yes ☐ No ☐ Unk

If yes, Dates of Hospitalization: \_\_\_\_/\_\_\_\_/\_\_\_\_ (DD,MM,YYYY)

Hospital Name: \_\_\_\_\_ District: \_\_\_\_\_

Case ID: \_\_\_\_\_

**IN THE PAST ONE (1) MONTH PRIOR TO SYMPTOM ONSET:**

1. Did the patient have contact with a suspected or confirmed Ebola case in the one month before becoming ill?

☐ Yes ☐ No ☐ Unk*If yes, please complete one line of information for each sick source case:*

| Name of Source Case | Relation to Patient | Date of Last Contact<br>(DD,MM,YYYY) | Village/Town | District | Was the person dead or alive?                                                                                    |
|---------------------|---------------------|--------------------------------------|--------------|----------|------------------------------------------------------------------------------------------------------------------|
|                     |                     | ____/____/____                       |              |          | <input type="checkbox"/> Alive<br><input type="checkbox"/> Dead<br>Date of Death: ____/____/____<br>(DD,MM,YYYY) |
|                     |                     | ____/____/____                       |              |          | <input type="checkbox"/> Alive<br><input type="checkbox"/> Dead<br>Date of Death: ____/____/____<br>(DD,MM,YYYY) |

2. Did the patient attend a funeral in the one month before becoming ill? ☐ Yes ☐ No ☐ Unk

| If yes, Name of deceased person | Relation to Patient | Date of Funeral<br>(DD,MM,YYYY) | Village/Town | District | Did the patient participate?<br>(carry or touch the body)?  |
|---------------------------------|---------------------|---------------------------------|--------------|----------|-------------------------------------------------------------|
|                                 |                     | ____/____/____                  |              |          | <input type="checkbox"/> Yes<br><input type="checkbox"/> No |

3. Did the patient travel outside their hometown or village/town before becoming ill? ☐ Yes ☐ No ☐ Unk
 If yes, Village: \_\_\_\_\_ Chiefdom: \_\_\_\_\_  
 District: \_\_\_\_\_ Date(s): \_\_\_\_/\_\_\_\_/\_\_\_\_ - \_\_\_\_/\_\_\_\_/\_\_\_\_ (DD,MM,YYYY)
**Case Report Form Completed by:**
 Name: \_\_\_\_\_ Phone: \_\_\_\_\_ E-mail: \_\_\_\_\_  
 Position: \_\_\_\_\_ District: \_\_\_\_\_ Health Facility: \_\_\_\_\_  
 Information provided by:  
☐ Patient ☐ Proxy *If proxy, Name:* \_\_\_\_\_ *Relation to patient:* \_\_\_\_\_
**Patient Outcome Information:***Please fill out this section at the time of patient recovery and discharge from the hospital OR patient death.*

Date Outcome Information Completed: \_\_\_\_/\_\_\_\_/\_\_\_\_ (DD,MM,YYYY)

Final Status of the Patient: ☐ Alive/Recovered ☐ Dead***If the patient has recovered and been discharged from the hospital:***

Hospital discharged from: \_\_\_\_\_ District: \_\_\_\_\_

Date of discharge from the hospital: \_\_\_\_/\_\_\_\_/\_\_\_\_ (DD,MM,YYYY)

***If the patient is dead:***

Date of Death: \_\_\_\_/\_\_\_\_/\_\_\_\_ (DD,MM,YYYY)

Place of Death: ☐ Community ☐ Hospital \_\_\_\_\_ District: \_\_\_\_\_

Date of Funeral/Burial: \_\_\_\_/\_\_\_\_/\_\_\_\_ (DD,MM,YYYY)

Funeral conducted by: ☐ Family/community ☐ Outbreak burial team

Place of Funeral/Burial: Village: \_\_\_\_\_ Chiefdom: \_\_\_\_\_ District: \_\_\_\_\_

## **Ward assessment form**

The following form was used by clinical staff to record baseline information for newly admitted patients (suspect and confirmed) to the Kerry Town Ebola treatment center.

Form completed by (write your name): \_\_\_\_\_

### BASIC PATIENT INFORMATION

Patient name: Surname \_\_\_\_\_ First name \_\_\_\_\_

Address: District \_\_\_\_\_ Chiefdom \_\_\_\_\_ Town \_\_\_\_\_

Sex: ☐ Male ☐ Female Other patient ID # (eg transfer facility): \_\_\_\_\_

Estimated age:  ☐ YEARS ☐ MONTHS (for children under 1 year)

### ADDITIONAL PATIENT INFORMATION

Can patient eat: ☐ Nothing ☐ Liquid only ☐ Semi-solid food ☐ Solid food

If Estimated Age is under 12 months (1 year):

Currently breastfed? ☐ YES ☐ NO ☐ Unknown

Next of kin: Name \_\_\_\_\_ Mobile # \_\_\_\_\_

Address: District \_\_\_\_\_ Town/village \_\_\_\_\_

### OBSERVATIONS

Disease stage: ☐ 1 (e.g. dry) ☐ 2 (e.g. diarrhoea/vomiting) ☐ 3 (e.g. shock, bleeding)

Current consciousness: ☐ A ☐ V ☐ P ☐ U Confused/agitated: ☐ YES ☐ NO

Clinically shocked? ☐ YES ☐ NO ☐ UNKNOWN

Temperature: [ ][ ] [ ][ ] . [ ][ ] °C

Heart Rate: [ ][ ][ ][ ] beats /min Respiratory Rate: [ ][ ][ ][ ] breaths /min

Weight (kg) | [ ][ ] | [ ][ ] . | [ ][ ] |

If child under 5 years, Mid Upper Arm Circumference (cm): | [ ][ ] | [ ][ ] . | [ ][ ] |

Systolic BP: [ ][ ][ ][ ] mmHg Diastolic BP: [ ][ ][ ][ ] mmHg

O<sub>2</sub> saturation: [ ][ ][ ][ ] % On: ☐ Room air ☐ Supplemental Oxygen ☐ Unknown

DATE: \_\_\_\_ / \_\_\_\_ / 2015  
DD / MM / YYYY

PATIENT ID #: KT-  -        
KT-2 = Triage; KT-3 = Confirmed; KT-4 = morgue

## SYMPTOMS

Number of days since earliest onset of symptoms: \_\_\_\_\_ days

|                                                      |                                                  |
|------------------------------------------------------|--------------------------------------------------|
| Fever <input type="checkbox"/>                       | Hiccups <input type="checkbox"/>                 |
| Fatigue <input type="checkbox"/>                     | Convulsions <input type="checkbox"/>             |
| Headache <input type="checkbox"/>                    | Seizures <input type="checkbox"/>                |
| Joint or muscle pain/aches <input type="checkbox"/>  |                                                  |
| Throat pain/Pain to swallow <input type="checkbox"/> | <u>If BLEEDING</u> , specify site:               |
| Unable to drink <input type="checkbox"/>             | Nose/mouth <input type="checkbox"/>              |
| Nausea <input type="checkbox"/>                      | Cough <input type="checkbox"/>                   |
| Vomiting <input type="checkbox"/>                    | Vomit <input type="checkbox"/>                   |
| Diarrhoea <input type="checkbox"/>                   | Urine <input type="checkbox"/>                   |
| Abdominal pain <input type="checkbox"/>              | Stool <input type="checkbox"/>                   |
| Breathing difficulty <input type="checkbox"/>        | Vaginal (non-menstrual) <input type="checkbox"/> |

Specify other symptoms:

## OTHER MEDICAL HISTORY

Does the patient CURRENTLY have any known co-morbidities? tick all that apply

- ☐ Tuberculosis ☐ HIV ☐ Heart disease ☐ Diabetes ☐ Asthma  
☐ Liver disease ☐ Renal disease ☐ Cancer

Other: \_\_\_\_\_

Does the patient have any known allergies? ☐ YES ☐ NO ☐ UNKNOWN

If YES, List \_\_\_\_\_

If patient is FEMALE:

Date of last menstruation \_\_\_\_\_ ☐ Unknown

Obstetric history: Gravida [ ] Parity [ ] Abortion [ ] Live [ ] Dead [ ]

Has the patient ever had a Caesarean section? ☐ YES ☐ NO ☐ UNKNOWN

Is the patient currently breastfeeding? ☐ YES ☐ NO ☐ UNKNOWN

Is the patient: ☐ Pregnant ☐ Postpartum (birth in last 6 weeks) ☐ Neither ☐ Unknown

If PREGNANT: Gestation age of fetus (nearest week): \_\_\_\_\_ weeks ☐ Unknown

DATE: \_\_\_\_ / \_\_\_\_ / 2015  
DD / MM / YYYY

PATIENT ID #: KT- [ ] - [ ] [ ] [ ] [ ] [ ]  
KT-2 = Triage; KT-3 = Confirmed; KT-4 = morgue

### PRE-EXISTING MEDICATIONS

List all medications patient is taking/prescribed prior to admission (e.g. antibiotics, antivirals, antifungal, antimalarials, analgesic/antipyretics)

| Name of medication ( <i>prefer generic name</i> ) | Dose and frequency               |
|---------------------------------------------------|----------------------------------|
|                                                   | <input type="checkbox"/> unknown |
|                                                   | <input type="checkbox"/> unknown |
|                                                   | <input type="checkbox"/> unknown |

### SIGNS

|                                                                       |                                                                                 |
|-----------------------------------------------------------------------|---------------------------------------------------------------------------------|
| Bruising <input type="checkbox"/> Yes <input type="checkbox"/> No     | Conjunctival injection <input type="checkbox"/> Yes <input type="checkbox"/> No |
| Pale/Anaemia <input type="checkbox"/> Yes <input type="checkbox"/> No | Hepatomegaly <input type="checkbox"/> Yes <input type="checkbox"/> No           |
| Jaundice <input type="checkbox"/> Yes <input type="checkbox"/> No     | Splenomegaly <input type="checkbox"/> Yes <input type="checkbox"/> No           |
| Rash <input type="checkbox"/> Yes <input type="checkbox"/> No         |                                                                                 |
| Other (please specify)                                                |                                                                                 |

### ADDITIONAL COMMENTS

DATE: \_\_\_\_ / \_\_\_\_ / 2015  
 DD / MM / YYYY

PATIENT ID #: KT-  -        
 KT-2 = Triage; KT-3 = Confirmed; KT-4 = morgue

## **Inpatient form**

The following form was used by clinical staff to record patient vital signs, observations, symptoms, and notes at least daily.

**INPATIENT FORM** (version 3.0)

**\*BEGIN NEW FORM ONCE THIS ONE IS COMPLETE**

**OBSERVATIONS and SIGNS**

|                                 |                                                                                                |                                                                                                |                                                                                                |                                                                                                |
|---------------------------------|------------------------------------------------------------------------------------------------|------------------------------------------------------------------------------------------------|------------------------------------------------------------------------------------------------|------------------------------------------------------------------------------------------------|
| Date: DD/MM                     | ___ / ___                                                                                      | ___ / ___                                                                                      | ___ / ___                                                                                      | ___ / ___                                                                                      |
| Time: 24 hr                     | ___ : ___                                                                                      | ___ : ___                                                                                      | ___ : ___                                                                                      | ___ : ___                                                                                      |
| # of days since admission       |                                                                                                |                                                                                                |                                                                                                |                                                                                                |
| Provider (your) name            |                                                                                                |                                                                                                |                                                                                                |                                                                                                |
| CURRENT Consciousness           | A V P U                                                                                        | A V P U                                                                                        | A V P U                                                                                        | A V P U                                                                                        |
| Temperature °C                  |                                                                                                |                                                                                                |                                                                                                |                                                                                                |
| Oxygen saturation (%)           |                                                                                                |                                                                                                |                                                                                                |                                                                                                |
| Respiratory rate breaths/minute |                                                                                                |                                                                                                |                                                                                                |                                                                                                |
| Heart rate beats/minute         |                                                                                                |                                                                                                |                                                                                                |                                                                                                |
| Systolic BP mmHg                |                                                                                                |                                                                                                |                                                                                                |                                                                                                |
| Diastolic BP mmHg               |                                                                                                |                                                                                                |                                                                                                |                                                                                                |
| Pale/Anaemia                    | <input type="checkbox"/> None <input type="checkbox"/> Some<br><input type="checkbox"/> Severe | <input type="checkbox"/> None <input type="checkbox"/> Some<br><input type="checkbox"/> Severe | <input type="checkbox"/> None <input type="checkbox"/> Some<br><input type="checkbox"/> Severe | <input type="checkbox"/> None <input type="checkbox"/> Some<br><input type="checkbox"/> Severe |
| <b>Hydration</b>                | Dehydration                                                                                    | <input type="checkbox"/> None <input type="checkbox"/> Some<br><input type="checkbox"/> Severe | <input type="checkbox"/> None <input type="checkbox"/> Some<br><input type="checkbox"/> Severe | <input type="checkbox"/> None <input type="checkbox"/> Some<br><input type="checkbox"/> Severe |
|                                 | Vomiting                                                                                       | <input type="checkbox"/> None <input type="checkbox"/> Some<br><input type="checkbox"/> Severe | <input type="checkbox"/> None <input type="checkbox"/> Some<br><input type="checkbox"/> Severe | <input type="checkbox"/> None <input type="checkbox"/> Some<br><input type="checkbox"/> Severe |
|                                 | Diarrhoea                                                                                      | <input type="checkbox"/> None <input type="checkbox"/> Some<br><input type="checkbox"/> Severe | <input type="checkbox"/> None <input type="checkbox"/> Some<br><input type="checkbox"/> Severe | <input type="checkbox"/> None <input type="checkbox"/> Some<br><input type="checkbox"/> Severe |

**SYMPTOMS (continued on next page)**

|                  |                                                                                                    |                                                                                                    |                                                                                                    |                                                                                                    |
|------------------|----------------------------------------------------------------------------------------------------|----------------------------------------------------------------------------------------------------|----------------------------------------------------------------------------------------------------|----------------------------------------------------------------------------------------------------|
| Overall symptoms | <input type="checkbox"/> Same<br><input type="checkbox"/> Better<br><input type="checkbox"/> Worse |
| Fatigue          | <input type="checkbox"/> None <input type="checkbox"/> Some<br><input type="checkbox"/> Severe     | <input type="checkbox"/> None <input type="checkbox"/> Some<br><input type="checkbox"/> Severe     | <input type="checkbox"/> None <input type="checkbox"/> Some<br><input type="checkbox"/> Severe     | <input type="checkbox"/> None <input type="checkbox"/> Some<br><input type="checkbox"/> Severe     |

Ward #: \_\_\_\_\_ Bed #: \_\_\_\_\_

PATIENT ID #: KT-  -   
KT-2 = Triage; KT-3 = Confirmed; KT-4 = morgue

**INPATIENT FORM** (version 3.0)

|                           |                                                                                                                                                                                                                                                                                                                                                                                                                                                                                                                                                                      |                                                                                                                                                                                                                                                                                                                                                                                                                                                                                                                                                                      |                                                                                                                                                                                                                                                                                                                                                                                                                                                                                                                                                                      |                                                                                                                                                                                                                                                                                                                                                                                                                                                                                                                                                                      |
|---------------------------|----------------------------------------------------------------------------------------------------------------------------------------------------------------------------------------------------------------------------------------------------------------------------------------------------------------------------------------------------------------------------------------------------------------------------------------------------------------------------------------------------------------------------------------------------------------------|----------------------------------------------------------------------------------------------------------------------------------------------------------------------------------------------------------------------------------------------------------------------------------------------------------------------------------------------------------------------------------------------------------------------------------------------------------------------------------------------------------------------------------------------------------------------|----------------------------------------------------------------------------------------------------------------------------------------------------------------------------------------------------------------------------------------------------------------------------------------------------------------------------------------------------------------------------------------------------------------------------------------------------------------------------------------------------------------------------------------------------------------------|----------------------------------------------------------------------------------------------------------------------------------------------------------------------------------------------------------------------------------------------------------------------------------------------------------------------------------------------------------------------------------------------------------------------------------------------------------------------------------------------------------------------------------------------------------------------|
| <b>Date:</b><br>DD/MM     | ____ / ____                                                                                                                                                                                                                                                                                                                                                                                                                                                                                                                                                          | ____ / ____                                                                                                                                                                                                                                                                                                                                                                                                                                                                                                                                                          | ____ / ____                                                                                                                                                                                                                                                                                                                                                                                                                                                                                                                                                          | ____ / ____                                                                                                                                                                                                                                                                                                                                                                                                                                                                                                                                                          |
| <b>Symptoms continued</b> | <input type="checkbox"/> Fever<br><input type="checkbox"/> Headache<br><input type="checkbox"/> Joint/muscle pain<br><input type="checkbox"/> Throat pain/<br>pain to swallow<br><input type="checkbox"/> Chest pain<br><input type="checkbox"/> Short of breath<br><input type="checkbox"/> Cough<br><input type="checkbox"/> Hiccups<br><input type="checkbox"/> Rash<br><input type="checkbox"/> Abdominal pain<br><input type="checkbox"/> Urine pain<br><input type="checkbox"/> Bleeding<br>Other symptoms (list):<br><br><input type="checkbox"/> NO SYMPTOMS | <input type="checkbox"/> Fever<br><input type="checkbox"/> Headache<br><input type="checkbox"/> Joint/muscle pain<br><input type="checkbox"/> Throat pain/<br>pain to swallow<br><input type="checkbox"/> Chest pain<br><input type="checkbox"/> Short of breath<br><input type="checkbox"/> Cough<br><input type="checkbox"/> Hiccups<br><input type="checkbox"/> Rash<br><input type="checkbox"/> Abdominal pain<br><input type="checkbox"/> Urine pain<br><input type="checkbox"/> Bleeding<br>Other symptoms (list):<br><br><input type="checkbox"/> NO SYMPTOMS | <input type="checkbox"/> Fever<br><input type="checkbox"/> Headache<br><input type="checkbox"/> Joint/muscle pain<br><input type="checkbox"/> Throat pain/<br>pain to swallow<br><input type="checkbox"/> Chest pain<br><input type="checkbox"/> Short of breath<br><input type="checkbox"/> Cough<br><input type="checkbox"/> Hiccups<br><input type="checkbox"/> Rash<br><input type="checkbox"/> Abdominal pain<br><input type="checkbox"/> Urine pain<br><input type="checkbox"/> Bleeding<br>Other symptoms (list):<br><br><input type="checkbox"/> NO SYMPTOMS | <input type="checkbox"/> Fever<br><input type="checkbox"/> Headache<br><input type="checkbox"/> Joint/muscle pain<br><input type="checkbox"/> Throat pain/<br>pain to swallow<br><input type="checkbox"/> Chest pain<br><input type="checkbox"/> Short of breath<br><input type="checkbox"/> Cough<br><input type="checkbox"/> Hiccups<br><input type="checkbox"/> Rash<br><input type="checkbox"/> Abdominal pain<br><input type="checkbox"/> Urine pain<br><input type="checkbox"/> Bleeding<br>Other symptoms (list):<br><br><input type="checkbox"/> NO SYMPTOMS |

|                 |  |  |  |  |
|-----------------|--|--|--|--|
| <b>Comments</b> |  |  |  |  |
|                 |  |  |  |  |

Ward #: \_\_\_\_ Bed #: \_\_\_\_

**PATIENT ID #:** KT-  -        
 KT-2 = Triage; KT-3 = Confirmed; KT-4 = morgue

## **Drug charts**

The following drug charts were used by clinicians and pharmacists to record and review medication prescriptions, as well as monitor medication administration dates/times. The first is a blank form for up to four medications. The second is an adult drug chart with three common medications (zinc sulphate, multivitamin tablets, and paracetamol) already filled in. The third is a similar pre-filled chart for pediatric patients, with zinc sulphate, multivitamin tablets, paracetamol, and vitamin A.

# Blank Drug Chart v3.6 Patient name: \_\_\_\_\_ Patient ID: KT- -

Complete **DRUG INFORMATION** (drug name, route, dose, frequency, your name, signature) when new drug is prescribed.

Write **DATE** (DD/MM) that drug is administered in "Date" column (1 day per column = 7 days on this form).

Write **YOUR INITIALS** and the **TIME** the drug was administered in the relevant time rows (e.g. "SBO 13:00" in the "Afternoon" row). 24hr clock.

Record **DURATION** by cancelling the column after the number of days you would like the patient to receive the drug by writing **STOP**.

|                         |             |                    |           | Date → |  |  |  |  |  |  |  |
|-------------------------|-------------|--------------------|-----------|--------|--|--|--|--|--|--|--|
| <b>Drug:</b>            |             | <b>Start Date:</b> |           |        |  |  |  |  |  |  |  |
| <i>Route</i>            | <i>Dose</i> | <i>Freq</i>        | Morning   |        |  |  |  |  |  |  |  |
|                         |             |                    | Afternoon |        |  |  |  |  |  |  |  |
| <i>Name (print)</i>     |             | <i>Signature</i>   | Evening   |        |  |  |  |  |  |  |  |
|                         |             |                    | Night     |        |  |  |  |  |  |  |  |
| <b>Drug:</b>            |             | <b>Start date:</b> |           |        |  |  |  |  |  |  |  |
| <i>Route</i>            | <i>Dose</i> | <i>Freq</i>        | Morning   |        |  |  |  |  |  |  |  |
|                         |             |                    | Afternoon |        |  |  |  |  |  |  |  |
| <i>Name (print)</i>     |             | <i>Signature</i>   | Evening   |        |  |  |  |  |  |  |  |
|                         |             |                    | Night     |        |  |  |  |  |  |  |  |
| <b>Drug:</b>            |             | <b>Start Date:</b> |           |        |  |  |  |  |  |  |  |
| <i>Route</i>            | <i>Dose</i> | <i>Freq</i>        | Morning   |        |  |  |  |  |  |  |  |
|                         |             |                    | Afternoon |        |  |  |  |  |  |  |  |
| <i>Name (print)</i>     |             | <i>Signature</i>   | Evening   |        |  |  |  |  |  |  |  |
|                         |             |                    | Night     |        |  |  |  |  |  |  |  |
| <b>Drug:</b>            |             | <b>Start Date:</b> |           |        |  |  |  |  |  |  |  |
| <i>Route</i>            | <i>Dose</i> | <i>Freq</i>        | Morning   |        |  |  |  |  |  |  |  |
|                         |             |                    | Afternoon |        |  |  |  |  |  |  |  |
| <i>Name (print)</i>     |             | <i>Signature</i>   | Evening   |        |  |  |  |  |  |  |  |
|                         |             |                    | Night     |        |  |  |  |  |  |  |  |
| <b>Pharmacist Check</b> |             |                    |           |        |  |  |  |  |  |  |  |

**Adult Drug Chart v3.6 Patient name:** \_\_\_\_\_

**Patient ID:** KT-  -

Complete **DRUG INFORMATION** (route, dose, frequency, your name, signature) when new drug is prescribed.

Write **DATE** (DD/MM) that drug is administered in "Date" column (1 day per column = 7 days on this form).

Write **YOUR INITIALS** and the **TIME** the drug was administered in the relevant time rows. 24hr clock.

Age \_\_\_ years Sex \_\_\_

Weight \_\_\_ kg

Record **DURATION** by cancelling the column after the number of days you would like the patient to receive the drug by writing **STOP**.

|                              |           |                          | Date →             |  |  |  |  |  |  |  |
|------------------------------|-----------|--------------------------|--------------------|--|--|--|--|--|--|--|
| <b>Zinc Sulphate (20 mg)</b> |           |                          | <b>Start Date:</b> |  |  |  |  |  |  |  |
| Route                        | Dose      | Freq                     | Morning            |  |  |  |  |  |  |  |
| Oral                         | 1 tablet  | Once daily (for 10 days) | Afternoon          |  |  |  |  |  |  |  |
| Name (print)                 |           | Signature                | Evening            |  |  |  |  |  |  |  |
|                              |           |                          | Night              |  |  |  |  |  |  |  |
| <b>Multivitamin tablets</b>  |           |                          | <b>Start Date:</b> |  |  |  |  |  |  |  |
| Route                        | Dose      | Freq                     | Morning            |  |  |  |  |  |  |  |
| Oral                         | 1 tablet  | Once daily               | Afternoon          |  |  |  |  |  |  |  |
| Name (print)                 |           | Signature                | Evening            |  |  |  |  |  |  |  |
|                              |           |                          | Night              |  |  |  |  |  |  |  |
| <b>Paracetamol (500mg)</b>   |           |                          | <b>Start Date:</b> |  |  |  |  |  |  |  |
| Route                        | Dose      | Freq                     | Morning            |  |  |  |  |  |  |  |
| Oral                         | 2 tablets | 4 times a day PRN        | Afternoon          |  |  |  |  |  |  |  |
| Name (print)                 |           | Signature                | Evening            |  |  |  |  |  |  |  |
|                              |           |                          | Night              |  |  |  |  |  |  |  |
|                              |           |                          | <b>Start Date:</b> |  |  |  |  |  |  |  |
| Route                        | Dose      | Freq                     | Morning            |  |  |  |  |  |  |  |
|                              |           |                          | Afternoon          |  |  |  |  |  |  |  |
| Name (print)                 |           | Signature                | Evening            |  |  |  |  |  |  |  |
|                              |           |                          | Night              |  |  |  |  |  |  |  |
| <b>Pharmacist Check</b>      |           |                          |                    |  |  |  |  |  |  |  |

# Paediatric Drug Chart v3.6 Patient name: \_\_\_\_\_ Patient ID: KT-    -

Complete **DRUG INFORMATION** (route, dose, frequency, your name, signature) when new drug is prescribed.

Write **DATE** (DD/MM) that drug is administered in "Date" column (1 day per column = 7 days on this form).

Write **YOUR INITIALS** and the **TIME** the drug was administered in the relevant time rows. 24hr clock.

Record **DURATION** by cancelling the column after the number of days you would like the patient to receive the drug by writing **STOP**.

Age \_\_\_ years Sex \_\_\_

Weight \_\_\_ kg

|                              |          |                        |                        | Date →    |  |  |  |  |  |  |  |
|------------------------------|----------|------------------------|------------------------|-----------|--|--|--|--|--|--|--|
| <b>Zinc Sulphate (20 mg)</b> |          | <b>Start Date:</b>     |                        |           |  |  |  |  |  |  |  |
| Route                        | Dose     | <12 months: ½ tablet   | Freq                   | Morning   |  |  |  |  |  |  |  |
| Oral                         |          | > 12 months: 1 tablet  | Once daily for 10 days | Afternoon |  |  |  |  |  |  |  |
| Name (print)                 |          | Signature              |                        | Evening   |  |  |  |  |  |  |  |
|                              |          |                        |                        | Night     |  |  |  |  |  |  |  |
| <b>Multivitamin tablets</b>  |          | <b>Start Date:</b>     |                        |           |  |  |  |  |  |  |  |
| Route                        | Dose     | Freq                   | Morning                |           |  |  |  |  |  |  |  |
| Oral                         | 1 tablet | Once daily             | Afternoon              |           |  |  |  |  |  |  |  |
| Name (print)                 |          | Signature              |                        | Evening   |  |  |  |  |  |  |  |
|                              |          |                        |                        | Night     |  |  |  |  |  |  |  |
| <b>Paracetamol</b>           |          | <b>Start Date:</b>     |                        |           |  |  |  |  |  |  |  |
| Route                        | Dose     | 7-11 Kg: 120 mg        | Freq                   | Morning   |  |  |  |  |  |  |  |
| Oral                         |          | 12-17 Kg: 240 mg       | Four times daily PRN   | Afternoon |  |  |  |  |  |  |  |
| Name (print)                 |          | Signature              |                        | Evening   |  |  |  |  |  |  |  |
|                              |          |                        |                        | Night     |  |  |  |  |  |  |  |
| <b>Vitamin A</b>             |          | <b>Start Date:</b>     |                        |           |  |  |  |  |  |  |  |
| Route                        | Dose     | 1- 6 months: 50,000 IU | Freq                   | Morning   |  |  |  |  |  |  |  |
| Oral                         |          | 6-12 months: 100,000   | Once daily for 2 days  | Afternoon |  |  |  |  |  |  |  |
| Name (print)                 |          | Signature              |                        | Evening   |  |  |  |  |  |  |  |
|                              |          |                        |                        | Night     |  |  |  |  |  |  |  |
| <b>Pharmacist Check</b>      |          |                        |                        |           |  |  |  |  |  |  |  |

## **Fluid infusion chart**

The following chart was used by clinical staff to order and monitor intravenous fluids given to a patient.

**INFUSION FLUIDS CHART (v3.4)** Patient name: \_\_\_\_\_

PATIENT ID: KT--

| DATE | INFUSION FLUID | VOLUME | RATE | ROUTE | Time | Given<br>by | Time | Checked<br>by | Time | Checked<br>by | Time | Checked<br>by |
|------|----------------|--------|------|-------|------|-------------|------|---------------|------|---------------|------|---------------|
|      |                |        |      |       |      |             |      |               |      |               |      |               |
|      |                |        |      |       |      |             |      |               |      |               |      |               |
|      |                |        |      |       |      |             |      |               |      |               |      |               |
|      |                |        |      |       |      |             |      |               |      |               |      |               |
|      |                |        |      |       |      |             |      |               |      |               |      |               |
|      |                |        |      |       |      |             |      |               |      |               |      |               |
|      |                |        |      |       |      |             |      |               |      |               |      |               |
|      |                |        |      |       |      |             |      |               |      |               |      |               |

## **Lab request form**

The following form was used by clinical staff to order lab tests from the 1) Public Health England on-site laboratory (for Ebola PCR and malaria rapid diagnostic tests) and 2) UK Ministry of Defense on-site laboratory (for various biochemistry blood tests).

# LAB REQUEST FORM – SAVE THE CHILDREN – KERRY TOWN EBOLA TREATMENT CENTRE

DATE: \_\_\_\_ / \_\_\_\_ / 2015  
DD / MM / YYYY

PATIENT ID #: KT-\_\_\_\_ - \_\_\_\_  
KT-2 = Triage; KT-3 = Confirmed; KT-4 = morgue

## BASIC PATIENT INFORMATION

Ward #: \_\_\_\_\_ Bed #: \_\_\_\_\_

Name: Surname \_\_\_\_\_ Given names \_\_\_\_\_

Sex: ☐ Male ☐ Female

Age: \_\_\_\_\_ ☐ YEARS or ☐ MONTHS (for children under 1 year)

## PRESCRIBER INFORMATION

Requested by (print your name): \_\_\_\_\_

Title: \_\_\_\_\_

## LAB TESTS (PHE)

☐ New admission (Malaria RDT + Ebola PCR)

☐ Repeat Ebola PCR

## LAB TESTS (MoD)

☐ Full Blood Count (purple)

☐ Coagulation screen (blue)

☐ Amylyte 13 (green)

**OR**

☐ Metlac 12 (green)

### Special request

☐ D-Dimer

☐ HIV

☐ Blood culture

☐ Dengue

### Amylyte 13

Sodium  
Potassium  
Urea  
Creatinine  
Glucose  
Calcium  
Albumin

Total Bilirubin  
ALT  
AST  
CK  
Amylase  
CRP

### Metlac 12

Sodium  
Potassium  
Urea  
Creatinine  
Glucose  
Calcium  
Albumin

Chloride  
Magnesium  
Lactate  
Phosphate  
Bicarbonate

## **Nutrition summary form**

The following form was used by clinical staff daily to record the type of food a patient could consume (solid, semi-solid, liquid, nothing) for meal preparation by the kitchen.

# **NUTRITION SUMMARY – SAVE THE CHILDREN – KERRY TOWN EBOLA TREATMENT CENTRE**

**DATE** (dd/mm/yyyy): \_\_\_\_ / \_\_\_\_ / 2015

**WARD #:** \_\_\_\_\_

*Fill in a line for each patient on the ward*

| Bed # | Patient ID #                                                                                                                                             | Name | Sex | Age | Type of food patient can eat                                                                                                           | Critically ill?                                             | Comments (e.g. consumption issues) |
|-------|----------------------------------------------------------------------------------------------------------------------------------------------------------|------|-----|-----|----------------------------------------------------------------------------------------------------------------------------------------|-------------------------------------------------------------|------------------------------------|
| 1     | KT- <input type="text"/> - <input type="text"/> <input type="text"/> <input type="text"/> <input type="text"/> <input type="text"/> <input type="text"/> |      |     |     | <input type="checkbox"/> Solid <input type="checkbox"/> Semi-solid<br><input type="checkbox"/> Liquid <input type="checkbox"/> Nothing | <input type="checkbox"/> Yes<br><input type="checkbox"/> No |                                    |
| 2     | KT- <input type="text"/> - <input type="text"/> <input type="text"/> <input type="text"/> <input type="text"/> <input type="text"/> <input type="text"/> |      |     |     | <input type="checkbox"/> Solid <input type="checkbox"/> Semi-solid<br><input type="checkbox"/> Liquid <input type="checkbox"/> Nothing | <input type="checkbox"/> Yes<br><input type="checkbox"/> No |                                    |
| 3     | KT- <input type="text"/> - <input type="text"/> <input type="text"/> <input type="text"/> <input type="text"/> <input type="text"/> <input type="text"/> |      |     |     | <input type="checkbox"/> Solid <input type="checkbox"/> Semi-solid<br><input type="checkbox"/> Liquid <input type="checkbox"/> Nothing | <input type="checkbox"/> Yes<br><input type="checkbox"/> No |                                    |
| 4     | KT- <input type="text"/> - <input type="text"/> <input type="text"/> <input type="text"/> <input type="text"/> <input type="text"/> <input type="text"/> |      |     |     | <input type="checkbox"/> Solid <input type="checkbox"/> Semi-solid<br><input type="checkbox"/> Liquid <input type="checkbox"/> Nothing | <input type="checkbox"/> Yes<br><input type="checkbox"/> No |                                    |
| 5     | KT- <input type="text"/> - <input type="text"/> <input type="text"/> <input type="text"/> <input type="text"/> <input type="text"/> <input type="text"/> |      |     |     | <input type="checkbox"/> Solid <input type="checkbox"/> Semi-solid<br><input type="checkbox"/> Liquid <input type="checkbox"/> Nothing | <input type="checkbox"/> Yes<br><input type="checkbox"/> No |                                    |
| 6     | KT- <input type="text"/> - <input type="text"/> <input type="text"/> <input type="text"/> <input type="text"/> <input type="text"/> <input type="text"/> |      |     |     | <input type="checkbox"/> Solid <input type="checkbox"/> Semi-solid<br><input type="checkbox"/> Liquid <input type="checkbox"/> Nothing | <input type="checkbox"/> Yes<br><input type="checkbox"/> No |                                    |
| 7     | KT- <input type="text"/> - <input type="text"/> <input type="text"/> <input type="text"/> <input type="text"/> <input type="text"/> <input type="text"/> |      |     |     | <input type="checkbox"/> Solid <input type="checkbox"/> Semi-solid<br><input type="checkbox"/> Liquid <input type="checkbox"/> Nothing | <input type="checkbox"/> Yes<br><input type="checkbox"/> No |                                    |
| 8     | KT- <input type="text"/> - <input type="text"/> <input type="text"/> <input type="text"/> <input type="text"/> <input type="text"/> <input type="text"/> |      |     |     | <input type="checkbox"/> Solid <input type="checkbox"/> Semi-solid<br><input type="checkbox"/> Liquid <input type="checkbox"/> Nothing | <input type="checkbox"/> Yes<br><input type="checkbox"/> No |                                    |

## **Discharge forms**

The following forms were completed by clinical staff when a patient was leaving the ward due to death, discharge home after recovery, or transfer to another facility. The first form (page 26) was deployed when the Kerry Town ETC in November 2014. The following two forms (pages 27 and 28) were deployed starting January 2015 when the suspect wards officially opened at the ETC.

# DISCHARGE FORM – SAVE THE CHILDREN – KERRY TOWN EBOLA TREATMENT CENTRE

DATE: \_\_\_\_ / \_\_\_\_ / 2015  
DD / MM / YYYY

PATIENT ID #: KT-\_\_\_\_ - \_\_\_\_  
KT-2 = Triage; KT-3 = Confirmed; KT-4 = morgue

## COMPLETE FORM IN WARD UPON DISCHARGE OR DEATH OF PATIENT

Final outcome: ☐ Deceased ☐ Discharged ☐ Transferred to other facility

*If Deceased*, date of death: \_\_\_\_ / \_\_\_\_ / 2015  
DD / MM / YYYY

*If Discharged*,

Discharge type: ☐ By staff ☐ Self-discharged ☐ Removed by family ☐ Unknown

Did the patient have a confirmed negative test for Ebola? ☐ YES ☐ NO

*If yes*, ☐ never had Ebola (discharged from suspect ward)

OR

☐ recovered from Ebola (discharged from recovery ward)

Discharge medications provided?

*If yes*, list medications \_\_\_\_\_

*If Transferred to other facility*,

Reason for transfer: \_\_\_\_\_

Name of new facility: \_\_\_\_\_

District/town of new facility: \_\_\_\_\_

Discharge medications provided?

*If yes*, list medications \_\_\_\_\_

Form completed by (print name): \_\_\_\_\_

Signature: \_\_\_\_\_

## Discharge form for Non-Ebola Patients from the ETC, Kerrytown

|                               |  |                       |  |
|-------------------------------|--|-----------------------|--|
| <b>Patient name &amp; Age</b> |  | <b>CI number</b>      |  |
| <b>Admission date</b>         |  | <b>Discharge date</b> |  |

PATIENT DID NOT MEET THE EBOLA CASE DEFINITION

☐

OR

PATIENT HAD A NEGATIVE EBOLA PCR AFTER > 3 DAYS OF SYMPTOMS

☐

This patient's symptoms began on the \_\_\_\_\_ and the patient had a negative ebola PCR on the \_\_\_\_\_

The patient was given a presumptive diagnosis of \_\_\_\_\_

Discharge medication:

|                        |  |              |  |
|------------------------|--|--------------|--|
| <b>Name of CHO/Dr:</b> |  |              |  |
| <b>Signature:</b>      |  | <b>Date:</b> |  |

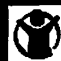**ACCEPTING HOSPITAL:**

|                                                                                                                                                                                |  |                                 |  |
|--------------------------------------------------------------------------------------------------------------------------------------------------------------------------------|--|---------------------------------|--|
| <b>Patient name</b>                                                                                                                                                            |  | <b>Date of admission to ETC</b> |  |
| <b>Hospital no.</b>                                                                                                                                                            |  | <b>Age</b>                      |  |
| <p>Date of symptom onset: _____</p> <p>Date of negative Ebola PCR test: _____</p> <p>Likely diagnosis:</p> <p>Reason for referral:</p> <p>Medications (with date started):</p> |  |                                 |  |
| <b>Name of Dr/CHO:</b>                                                                                                                                                         |  |                                 |  |
| <b>Signature:</b>                                                                                                                                                              |  | <b>Date:</b>                    |  |

## **Exit form**

The following form was completed by staff when a patient was discharged from the facility. This form was for administrative purposes, including information for patient follow-up and provision of discharge packets.

# EXIT FORM – SAVE THE CHILDREN – KERRY TOWN EBOLA TREATMENT CENTRE

DATE: \_\_\_\_ / \_\_\_\_ / 2015  
DD / MM / YYYY

PATIENT ID #: KT- [ ] - [ ] [ ] [ ] [ ] [ ]  
KT-2 = Triage; KT-3 = Confirmed; KT-4 = morgue

## COMPLETE FORM IN DISCHARGE TENT UPON DISCHARGE FROM ETC

Discharge pack given to: ☐ Patient ☐ Family of deceased patient

Name of patient: Surname \_\_\_\_\_ First name \_\_\_\_\_

Name of recipient: Surname \_\_\_\_\_ First name \_\_\_\_\_

Mobile # \_\_\_\_\_ 2<sup>nd</sup> mobile # \_\_\_\_\_

Where is the recipient going now: House#/Street (if any) \_\_\_\_\_

District \_\_\_\_\_ Chiefdom/Ward \_\_\_\_\_

Town/village \_\_\_\_\_

Mode of transportation: ☐ Save the children vehicle ☐ Taxi ☐ Family ☐ Other

Is the patient accompanied by SCI staff: ☐ YES ☐ NO

If yes, Name of the accompanying person: \_\_\_\_\_

If no, reason : \_\_\_\_\_

### Discharge package

Solidarity kit provided? ☐ YES ☐ NO

Hygiene kit provided? ☐ YES ☐ NO

Food ration provided? ☐ YES ☐ NO

Condoms provided? ☐ YES ☐ NO

Cash provided (Le 750,000)? ☐ YES ☐ NO

Certificate of discharge provided? ☐ YES ☐ NO

Discharge package given by:

Recipient name:

Signature:

Signature:

## **Evaluation form**

The following form was used by staff to obtain feedback about the patient's experience during their stay at the Kerry Town Ebola treatment center. This form was not used for formal evaluation, and it was acknowledged that the answers would be biased because these forms were completed only by survivors on the day they were discharged from the treatment center.

# EVALUATION FORM – SAVE THE CHILDREN – KERRY TOWN EBOLA TREATMENT CENTRE

DATE: \_\_\_\_ / \_\_\_\_ / 2015  
DD / MM / YYYY

PATIENT ID #: KT-  -       
KT-2 = Triage; KT-3 = Confirmed; KT-4 = morgue

## COMPLETE FORM IN DISCHARGE TENT UPON DISCHARGE FROM ETC

Name of patient: Surname \_\_\_\_\_ First name \_\_\_\_\_

For each of the topics below, please circle a number from 1 to 5 to describe your experience, where 1 is the **worst possible** and 5 is the **best possible**. If you have more comments to add, please write them in the box.

Please give your opinion of:

|                                   | Rating    | Comments |
|-----------------------------------|-----------|----------|
| The admission process             | 1 2 3 4 5 |          |
| Cleanliness of the ward           | 1 2 3 4 5 |          |
| The food                          | 1 2 3 4 5 |          |
| The way staff behaved towards you | 1 2 3 4 5 |          |
| Your medical care                 | 1 2 3 4 5 |          |
| Your comfort                      | 1 2 3 4 5 |          |
| Communication with your relatives | 1 2 3 4 5 |          |
| Support after discharge           | 1 2 3 4 5 |          |
| The ETC overall                   | 1 2 3 4 5 |          |

## **Discharge certificate**

The following form was completed by staff and provided to survivors upon discharge from the Kerry Town Ebola treatment center.

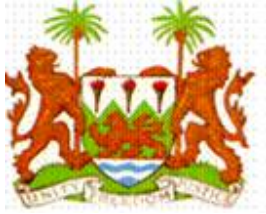

Government of Sierra Leone  
Ministry of Health and Sanitation

# EBOLA TREATMENT CENTER KERRY TOWN

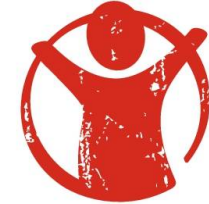

Save the Children

## **CERTIFICATE OF DISCHARGE**

We, hereby, certify that Mr/Mrs/Miss.....  
has been successfully treated at the Kerry Town Ebola Treatment Centre and  
is now **free of Ebola**. He/she does not constitute any risk to the community in  
any way.

Kerry Town, Ebola Treatment Center

Date :

Clinical Lead , Name and signature :

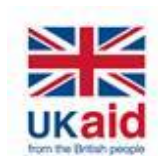

## **Death certificate**

The following form was completed by staff for patients who died during their stay at the Kerry Town Ebola treatment center.

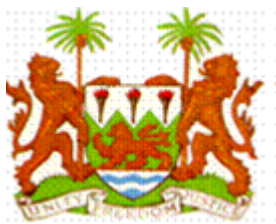

Government of Sierra Leone  
Ministry of Health and Sanitation

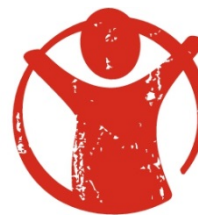

**Save the Children**

## **DEATH CERTIFICATE**

### ***KERRY TOWN – EBOLA TREATMENT CENTER***

**We, hereby, certify that Mr/Mrs/Miss .....,**

**admitted in the Ebola Treatment Center at Kerry Town on ...../...../.....,**

**died in our facility. He was tested as an Ebola positive patient.**

**Date of death: .... /.... /.... Time of death: .....**

-----

**Name and Signature**

**Clinical Doctor**
